# An Open Source Unsupervised Algorithm for Identification and Fast Prediction of Behaviors

Alexander I. Hsu<sup>1</sup> and Eric A. Yttri<sup>1,2</sup>

<sup>1</sup>*Department of Biological Sciences, Carnegie Mellon University, Pittsburgh, PA USA*

<sup>2</sup>*Neuroscience Institute, Carnegie Mellon University, Pittsburgh, PA USA*

**Running title:** An Open Source Unsupervised Algorithm for Identification and Fast Prediction of Behaviors

**Corresponding Author:**

Eric A. Yttri

Email: [eyttri@andrew.cmu.edu](mailto:eyttri@andrew.cmu.edu)

## 1 **Abstract**

2 Studying naturalistic behavior remains a prohibitively difficult objective. Recent machine learning advances have  
3 enabled limb localization. Extracting behaviors, however, requires ascertaining the spatiotemporal patterns of these  
4 positions. To provide the missing bridge from poses to actions and their kinematics, we developed B-SOiD - an  
5 open-source, unsupervised algorithm that identifies behavior without user bias. By training a machine classifier on  
6 pose pattern statistics clustered using new methods, our approach achieves greatly improved processing speed and  
7 the ability to generalize across subjects or labs. Using a frameshift alignment paradigm, B-SOiD overcomes previous  
8 temporal resolution barriers that prevent the use of other algorithms with electrophysiological recordings. Using only a  
9 single, off-the-shelf camera, B-SOiD provides categories of sub-action for trained behaviors and kinematic measures of  
10 individual limb trajectories in an animal model. These behavioral and kinematic measures are difficult but critical to  
11 obtain, particularly in the study of pain, OCD, and movement disorders.

12 **Keywords**— computational neuroethology, naturalistic behavior, open source, unsupervised learning, pose estimation, kinematics,  
13 open-field, grooming, action selection

14 The brain has evolved to support the generation of individual limb movements strung together to create natural behavior.  
15 The selection, performance, and modification of these actions is key to an animal's continued survival<sup>1</sup>. Establishing  
16 the neural underpinnings of this behavioral repertoire is one of the foundations of neuroscience<sup>2</sup>; however, research  
17 largely focuses on stereotyped, reductionist, and over-trained behaviors due to their ease of study. Beyond the potential  
18 confounds associated with artificial or over-trained tasks, this line of interrogation discards most of the behavioral  
19 repertoire and its intricate transition dynamics<sup>3-5</sup>. Comprehensive behavioral tracking requires accurate behavioral  
20 identification and quantification (e.g. kinematics and transitions at meaningful timescales).

21 Typically, behavioral scientists have relied upon top-down methods in which pre-established criteria are applied to  
22 behavioral data<sup>6-9</sup>. These methods, which include laborious human rating, have benefited from advances in supervised  
23 machine learning methods for classification<sup>10</sup>, achieving accuracy on par with human labeling. Although these  
24 approaches can be useful, supervised machine learning classifiers are trained to replicate their user's annotations. These  
25 human annotations, however, are prone to observer biases and are known to suffer from high inter-rater variability<sup>11-13</sup>  
26 and typically possess low temporal resolution. Moreover, the experimental flexibility is typically quite limited. Because  
27 of their one-size fits all approach, the top-down rubric may have diminished sensitivity to the many perturbations that  
28 could not be encompassed in the training data set. However, these perturbations comprise the majority of use cases (see  
29 von Ziegler et al.<sup>14</sup> and Sturman et al.<sup>13</sup>).

30 To overcome these top-down limitations, Shaevitz, Berman, and colleagues began a new generation of unsupervised  
31 learning algorithms utilizing nonlinear dimensionality reduction of the complex behavioral space to identify stereotyped  
32 behaviors (*MotionMapper*<sup>15-17</sup>). Specifically, movement is quantified by aligning the body the in each frame, then  
33 extracting the spectral energy of the protruding limbs. This time-frequency information is then reduced down to a two  
34 dimensional space (see Todd et al.<sup>18</sup> for review of various algorithmic implementations). The spectral energy component  
35 of this approach is particularly well-suited to extract the movement of orthogonal limbs, such as fly appendages sticking  
36 out from their bodies<sup>19</sup>. In soft-bodied invertebrates like worms and fly larvae, similar methods using decomposed  
37 body shape dynamics have been used with success<sup>20-22</sup>. However, these studies require model organisms that generate  
38 primarily orthogonal movements that are optimal for the frequency domain information they rely upon. As such, these

39 methods have seen few applications in the study of vertebrate behavior. Additionally, to best extract this spectral  
40 information, these methods depend critically on a uniform background, commonplace in a fly dish, but more rare in  
41 vertebrate cages.

42 More recently, a proprietary package, *MoSeq*<sup>23</sup> advanced the field through the use of "spinograms" obtained from a  
43 specialized depth camera in conjunction with unsupervised hierarchical clustering methods to identify action groups.  
44 While MoSeq represents the first unsupervised segmentation in rodents, it highlights a greater issue concerning scales  
45 of behavioral extraction. First, both the action and its kinematics are critical, particularly to the study of several  
46 disease states<sup>24–26</sup>. Second, the low temporal resolution of most methods limits the applicability of any results with  
47 electrophysiological recordings. Third and perhaps most impactful, to maximize reproducibility and experimental  
48 efficiency, methods must be generalizable across sessions and across research groups. Current unsupervised methods  
49 are insufficient.

50 Recent advances in computer vision and machine learning have enabled automatic tracking of body part positions<sup>12,27,28</sup>.  
51 Although limb position or pose can be informative, its behavioral interpretability is quite low. For instance, the location  
52 of a paw may be used to determine stride length, but it does not capture what the animal is doing with that paw.  
53 Moreover, the various top-down frameworks that each user may create are incredibly subjective and may not generalize  
54 between animals of different sizes or cameras with differing frame rates<sup>11</sup>.

55 Taking inspiration from the converging lines of technology, we created a platform that extracts the spatiotemporal  
56 patterns of these identified body poses (e.g. behaviors), of any subject. An important feature of our algorithm, B-SOiD,  
57 is that pose relationships are used to train a multi-class classifier that then can be used to bypass the intermediate  
58 transformation and clustering stages. In doing so, B-SOiD performs more quickly (100,000 frames/minute on a typical  
59 laptop) and with higher fidelity - as it is no longer limited to a single session's data set to define cluster boundaries.  
60 **More importantly, once trained, the algorithm can generalize across animals, cameras, and setups**, thus solving the issue  
61 of transference. With the utilized position information, B-SOiD provides a 2D readout of kinematics, and can provide  
62 temporal resolution in the single milliseconds, required for use with electrophysiological methods. We provide this

63 platform as an open-source, step-by-step GUI interface to enable autonomous behavior identification and classification  
64 based upon the discovered pose relationships.

65 Here, we demonstrate B-SOiD's use in a variety of experimental models (mouse open field behavior, rat reach to grasp  
66 task, and human kinesiology data) We also benchmark the tool across different camera angles and against the current  
67 state of the art. Demonstration of distinct neural signatures corresponding to the identified behaviors and the analytical  
68 utility of the improved temporal resolution are also provided. Finally, we reveal robust kinematic changes following a  
69 cell-type specific lesion that are otherwise unobservable with current methods.

## 70 **Results**

71 We provide here an open source tool to resolve distinct behaviors (1). To achieve this end, we sought to make use of pose  
72 estimation software, which uses computer vision and machine learning to identify the location of body parts from video.  
73 These techniques have made huge strides in recent years, but making sense of those data remains difficult. We begin  
74 with a summary of the behavioral classification/segmentation tool (Supp Fig S1), its computational underpinnings, and  
75 basic benchmarking. In addition to the extraction of behavior from poses, B-SOiD provides a signal processing method  
76 that provides temporal resolution matching the video frame rate. We then demonstrate the utility of this increased  
77 resolution - increased signal signal of the neural activity of behavior. In doing so we also provide neurophysiological  
78 verification of the mathematical-derived behavioral groups. We then quantify the algorithm's performance across  
79 different camera angles and compare it to the current state of the art. These measures also serve to validate the external  
80 and internal consistency of the method, respectively. The manuscript concludes with a real-world example of B-SOiD's  
81 potential, detecting several canonical grooming types and their kinematic composition, critical information that is not  
82 available via other methods.

83 B-SOiD is an openly available tool to identify and extract behavioral classes at millisecond timescales - all with a  
84 single, off-the-shelf camera (Supp. Video S1). Because B-SOiD identifies spatiotemporal patterns in labeled body part  
85 positions, it has no a priori limit on camera angle or organism (see Fig. S2 and Supp. Video S2 for rat reaching task  
86 throughout training - including the same identified grasping behavior with and without a sugar pellet present, Fig. S3

87 [and Video S3](#) for human exercising with positions extracted using OpenPose<sup>29,30</sup>, [and Supp. Video S4 for categorization](#)  
88 [of Drosophila behavior. Screenshots can be found in Fig. 1d for summary](#)). For simplicity we focus here on a bottom-up  
89 view of six body part locations (snout, paws, tail-base, as identified by DeepLabCut) of a mouse in order to best resolve  
90 the animal's limb kinematics. B-SOiD extracts the spatiotemporal relationships between all position inputs (speed,  
91 angular change, distance between tracked points - Fig. 1a). After embedding these high-dimensional measurements  
92 into a low-dimensional space UMAP, a state-of-the-art dimensionality reduction algorithm<sup>31</sup>, a hierarchical clustering  
93 method, HDBSCAN, is used to extract dense regions separated by sparse regions<sup>32</sup>. Although defining clusters in  
94 low-dimensional spaces is largely sufficient to achieve the desired behavioral identification<sup>15,16,18,33</sup>, doing so is a  
95 computationally expensive process. Additionally, behavioral transference in the low dimensional space is difficult  
96 to evaluate, owing partly due to the non-linearity in dimensionality reduction. To overcome both of these issues, we  
97 utilized a machine learning classifier that learns to predict behaviors based on the high dimensional measurements  
98 (Fig. 1a). This approach provides greatly improved computational speed (processing time for one hour of 60fps data  
99 containing [six](#) poses is under five minutes with [a 128GB](#) RAM CPU found on a Desktop) and a consistent model  
100 that enables generalization across data sets within or across labs. Because the classifier is trained to partition pose  
101 relationships, not their low-dimensional representations, the defined clusters are further apart from one another, greatly  
102 improving consistency over statistical embedding methods (for unsupervised behavioral metrics comparing high vs.  
103 low dimensional behavioral representation, see Todd et al.<sup>18</sup>). Finally, to improve functionality, we have increased  
104 accessibility - [formatting the code into](#) a downloadable app which provides an intuitive, step-by-step user interface (Fig.  
105 1b).

#### 106 **B-SOiD extracts behavioral clusters in high-dimensional space.**

107 Behaviors can be parsed into a sequence of pose relationships that the brain has evolved to perform<sup>34,35</sup>. To reduce  
108 dimensions of those spatiotemporal pose relationships, B-SOiD implements Uniform Manifold Approximation and  
109 Projection (UMAP), next generation dimensionality reduction method<sup>31</sup> to simplify computations without simplifying  
110 the complexity of the behavior space. This non-linear dimensionality reduction approach provides an improved ability to  
111 delineate high-dimensional data in low-dimensional space over linear methods<sup>31,36,37</sup>. In particular, UMAP is preferred

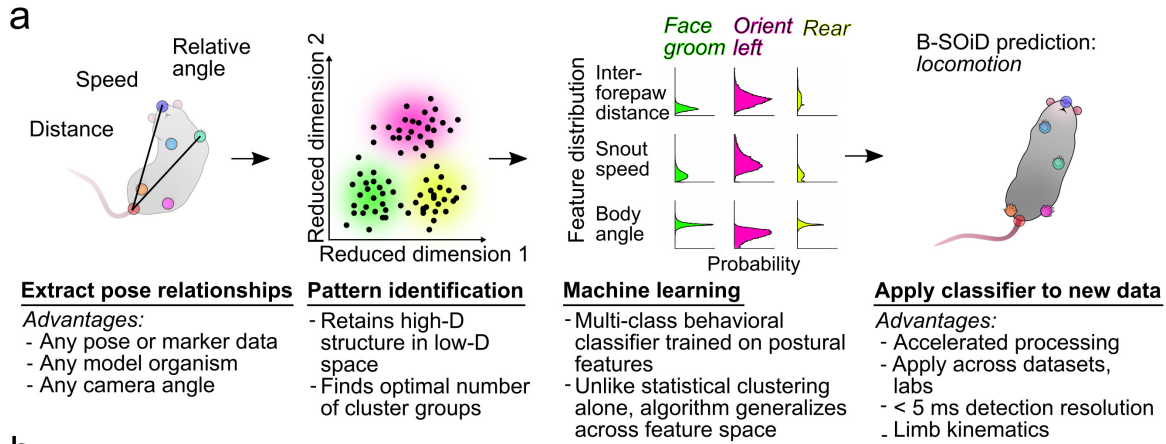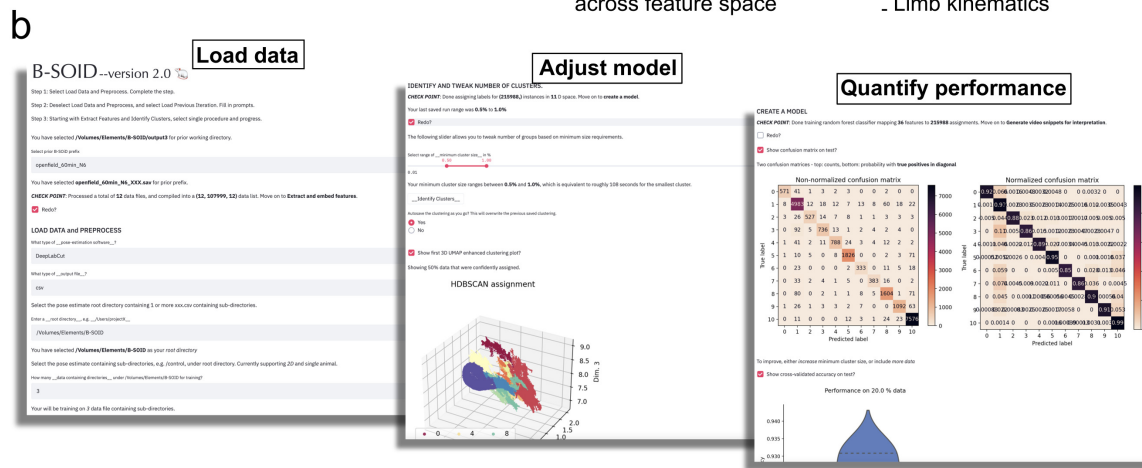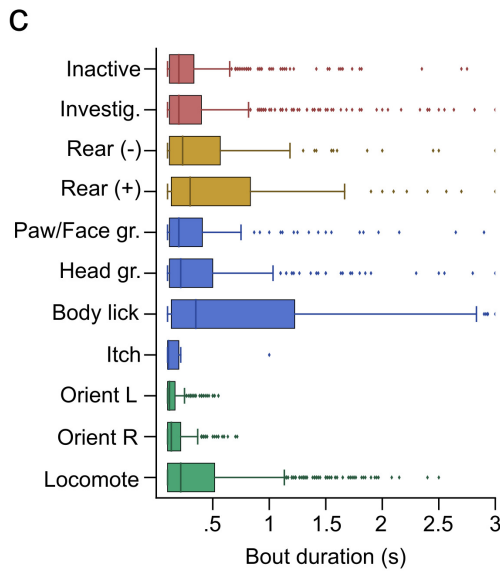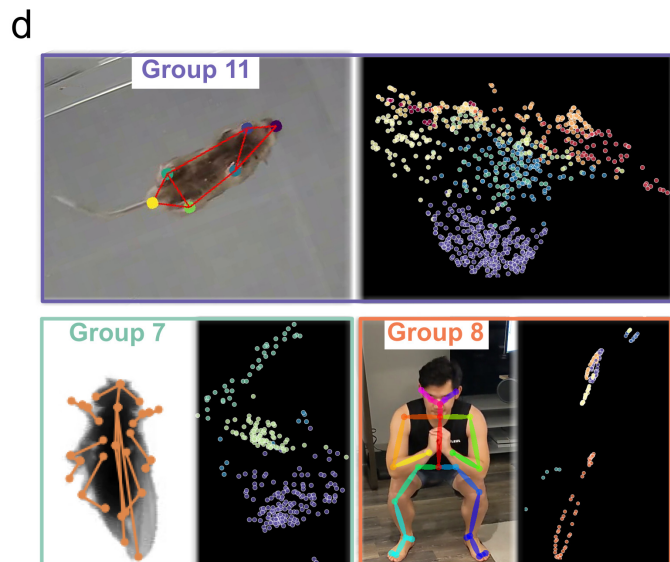

Figure 1: B-SOiD process flow and app interface

Figure 1: (a) After extracting the pose relationships that define behaviors, B-SOiD performs a nonlinear transformation (UMAP) to retain high-dimensional postural time-series data in a low-dimensional space and subsequently identifies clusters (HDBSCAN). The clustered spatiotemporal features are fed as inputs to train a random forests machine classifier. This classifier can then be used to quickly predict behavioral categories in any related data set. Once trained, the model will segment any dataset into the same groupings. (b) Screen shots from B-SOiD app GUI, available freely for download. Examples of simple language progress from loading data, to improving model, and quantifying performance are shown. (c) Bout durations for each of the identified behaviors during one hour-long session. (d) Snapshot of state space aligned to animal freely moving in respective environments (top: mouse from bottom-up using DeepLabCut tracking; bottom left: fruit fly from top-down using LEAP tracking; bottom right: first author from cell phone camera using OpenPose tracking). Color of group number refers to colored distribution within UMAP space.

112 over t-SNE (t-Distributed Stochastic Neighbor Embedding) for its ability to preserve global pairwise distances in  
113 embedding. This feature is critical for users to manipulate behavioral delineation. More concretely, if the user considers  
114 segmented behaviors not critical for their research question, allowing preservation of global pairwise distances enables  
115 supervision in the number of behavioral groups.

116 Although non-linear dimensionality reduction algorithms may be advantageous when the output is two-dimensional,  
117 systematic exploration of unsupervised algorithms for animal behavior suggests that embedding in high-dimensional  
118 space improves results across various metrics<sup>18</sup>. To that end, we allowed UMAP embeddings to exist in a high  
119 dimensional space. Similar to Todd et al., we projected our data down to the number of dimensions required to  
120 achieve  $\geq 0.7$  variance explained using PCA. In this dataset assembled across six animals, the criteria number of  
121 dimensions was 11. To segregate behavioral assignments in the 11-dimensional UMAP space, we employed a  
122 hierarchical clustering method - Hierarchical Density Based Spatial Clustering of Applications (HDBSCAN)<sup>32</sup>. Similar  
123 density-based clustering methods have been employed for unsupervised segmentation of behaviors in both vertebrates  
124 and invertebrates<sup>15,16,38-42</sup>. However, HDBSCAN is particularly well-suited to address the inevitable variability in  
125 pose estimations, even with with state-of-the-art software (see methods for specific HDBSCAN parameters), enabling  
126 B-SOiD to purify the training data to assign every frame.



## 127 **Algorithmic benchmarking**

128 When trained B-SOiD on video from six mice, **in which it** identified 11 classes in the 11-dimensional space (clearly  
129 distinguishable in pose relationship space, **Fig. 1c**, Fig. 2b, see [https://github.com/runninghsus/bsoid\\_  
130 figs/blob/main/examples/README.md](https://github.com/runninghsus/bsoid_figs/blob/main/examples/README.md) for spatiotemporal relationship distributions. Note, dimensionality  
131 count and group count are the same only be happenstance). Though not a given, the conserved kinematic  
132 motifs of the groups easily mapped onto established ethological names. For organizational purposes, we grouped  
133 these behaviors according to <http://mousebehavior.org/ethogram-index/> (red=quiescence, gold=rear,  
134 blue=maintenance, green=move; to be used throughout this manuscript).

135 As a first pass to verify that B-SOiD did not errantly merge behaviors, we randomly isolated videos based on  
136 behavioral class assignments, and found behavioral assignments to be internally consistent (See [https://github.  
137 com/runninghsus/bsoid\\_figs/blob/main/examples/README.md](https://github.com/runninghsus/bsoid_figs/blob/main/examples/README.md) for details). This visual consistency  
138 approximates the human rating that a supervised algorithm would be based upon. In addition, meta-analyses on physical  
139 features showed distinct multi-feature distributions (full **parameter** distributions for each group available at the same  
140 **link**).

141 We observed that the clustered groups of spatiotemporal pose patterns did not change with animal color or size. The  
142 body length **of the** brown mouse in Fig. 2a is 50 percent **greater** than **that of** the black mouse (5.9cm vs 3.9cm), but both  
143 were clustered with the same B-SOiD model (**and both contributed to the validation metrics shown here**). We noted that  
144 in some instances B-SOiD ignored subtleties in body conformation, i.e. grooming at different places along the torso  
145 were all considered to be members of the same 'body lick' group (Fig. 2a). In other instances, B-SOiD separated related  
146 but fundamentally distinct kinematic patterns. In particular, without instruction to do so, B-SOiD identified the three  
147 canonical grooming types. These actions, first described decades ago as the syntactic chain of self-grooming in rodents,  
148 are paw/face groom, head groom, and body lick<sup>34,43,44</sup>. Itching with the hind leg was also identified, distinguished  
149 from any groom type using the forelimbs. **This ability to both generalize and differentiate is vital to accurate behavioral  
150 segmentation and is largely the due to utilizing machine learning to recognize the spatiotemporal patterns. The algorithm**

151 seizes upon the conserved, repeated features and accepts the variability in others (see Supplementary Video S1 for  
152 summary definitions and video examples). Note that cluster size limits can be adjusted in the aforementioned GUI,  
153 providing the user additional control over the grouping detail (see parsing of reach-to-grasp into sub-actions in Fig. S2)

154 To improve consistency, speed, and applicability in classifying behaviors, we equipped B-SOiD with a random forest  
155 classifier. The random forest classifier is well-suited for high-dimensional feature training and has been shown to predict  
156 low-dimensional representation of high-dimensional features well, particularly compared to potential alternatives like  
157 MLP or SVM<sup>36</sup> (see Methods for classifier design). To test whether these pose relationships can be learned accurately,  
158 we tested the mapping on randomly selected 20% of the data. The predicted labels generated by our random forest  
159 classifier matched cluster assignments by HDBSCAN ('true labels') over 90% of the time. Indeed, the confusion matrix  
160 and 10-fold validation indicate that high-dimensional features can be robustly assigned given low-dimensional group  
161 assignments (Fig. 2b,c).

#### 162 **Frameshift paradigm enables behavioral segmentation at temporal resolution sufficient for electrophysiology.**

163 Accurate resolution of the timing of behavior transitions is a necessary feature of segmentation beyond identification.  
164 We present two example transitions (Fig. 2d), at 10 frames per second (fps) a temporal resolutions on par with many  
165 current methods. Although the group identification is correct, the large inter-frame interval misses the transition time,  
166 leading to much of the behavior being inaccurately categorized. Resolving transitions with adequate precision for use  
167 with electrophysiological measures requires considerably faster sampling rates, which are unavailable given current  
168 technology. However, a particular challenge in defining behaviors at a high sampling rate is that pose location jitter  
169 dominates the signal from any movement (Fig. 2e (left)). It is precisely this loss of frame-to frame difference at high  
170 sampling rates that makes 10fps sampling a popular temporal resolution.

171 To enable the resolution of behavioral transitions at the scale of single milliseconds, we introduced a "frameshift"  
172 manipulation, borrowed from recent automatic speech recognition innovations<sup>45</sup>, (Fig. 2e (right)). Briefly, B-SOiD  
173 initially downsamples all video, regardless of framerate, to 10fps to achieve a high signal to noise ratio in the  
174 spatiotemporal dynamics of the markers. The process is then repeated, with each new set of predictions made

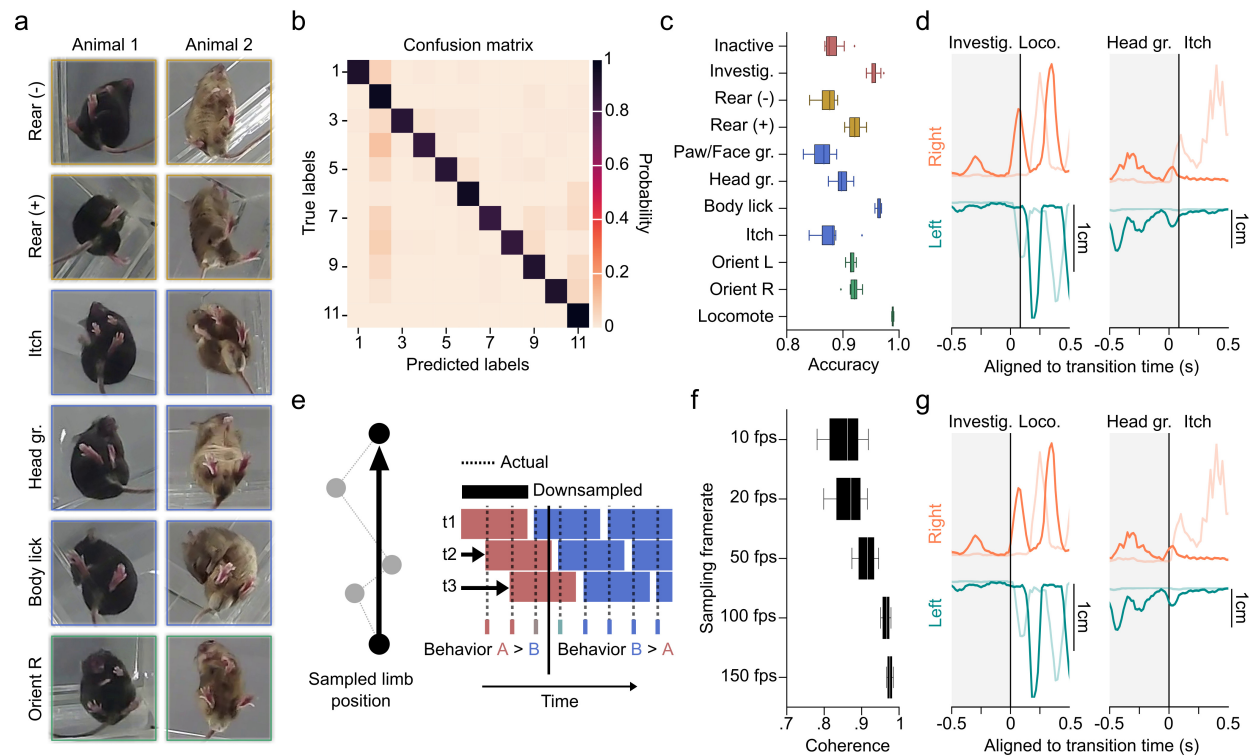

**Figure 2: Performance quantification across multiple temporal resolutions with novel machine learning algorithms.** (a) Snapshots of a small(left) and large(right) mouse 300ms into the execution of example behaviors. (b) Confusion matrix on the 20% held-out data. True positive predictions appear on the diagonal. (c) 10-fold cross-validation yield high accuracy on shuffled data across behavioral groups (21600 data points/test). (d) Trajectory plots of right (orange) and left (teal) limbs of the fore paw (darker) and hind paw (lighter) demonstrating example transitions from investigate to locomote (left), and head groom to itch (right). Vertical lines denote transition time as identified by basic B-SOiD analysis (10fps). (e) Schematized example of the potential for prediction noise in pose estimation to override the movement signal at high sampling rates (left). To overcome this, we executed a frameshift computation to derive high resolution transition times from downsampled, high signal data (right). (f) Percent coherence between low frequency and progressively higher resolution frameshift data. A major break occurs under for data under 50fps. (g) Same trajectories as in (d), now incorporating frameshift algorithm to improve resolution of transitions.

175 on downsampled data, each time offset by an additional frame ( $t_1$ ,  $t_2$ ,  $t_3$  in Fig. 2e (right)). In essence, we  
176 decompose the high-resolution signal and run a sliding threshold for fitting the high-SNR decomposition. By combining  
177 behavior assignments extracted from the shifted, downsampled data, we gain improved transition time resolution  
178 while overcoming the hurdle of decreased signal-to-noise (Fig. 2f,g). Note, improving transition resolution does not  
179 fundamentally change the distribution of action durations observed at 10fps. Thus frameshifting carries over the robust  
180 behavioral signal provided by lower sampling to the native resolution of the camera used.

181 As an example, B-SOiD automatically downsampled the 200fps used here to 10fps, then segments the downsampled  
182 data 20 times; each iteration offset by a single, 5ms frame. We quantified the effect of different temporal resolutions  
183 by first subsampling a 200fps video, thus providing an internally consistent comparison across resolutions (e.g. to  
184 extract 20fps for analysis, we used every tenth frame of the 200fps video). B-SOiD was then run independently on each  
185 resolution of the video, using frameshifting on each version. With the original 200fps as a standard, we observed that the  
186 predictions across resolutions was highly coherent. Even at 10fps (which was not further downsampled/frameshifted),  
187 we observed a median coherence of  $\sim 84\%$  across behavioral groups, Fig. 2f). As sampling rate increased, coherence  
188 improved - although the added benefit of increased sampling rate plateaus after 50fps. These changes can be attributed  
189 to an increase in transition time accuracies, as seen in Fig. 2g and Supp. Fig 4. The frameshift paradigm allows B-SOiD  
190 to predict behaviors at a temporal resolution matching the sampling rate of the original video, enabling a notably  
191 deeper analysis of action kinematics (Fig. 2d, g). Given the excellent performance above 50fps and the impetus to use  
192 less-specialized cameras, the remainder of this manuscript focuses on easily attainable 60fps video.

### 193 **Increased transition fidelity improves neural signature resolution.**

194 Improved temporal resolution is a critical advancement for analyzing neural correlates of spontaneous behaviors<sup>46</sup>.  
195 To assess the real-world benefit of increased temporal resolution, we simultaneously recorded 35 units from the left  
196 caudal forelimb area of motor cortex in a mouse as it navigated the open field arena (see Methods). We then aligned the  
197 activity to the onset of classified actions using non-frameshift (10fps) and frameshift (60fps) predictions.

198 In this first demonstration of motor cortical activity aligned to the breadth of naturalistic behaviors observed, we noted

199 distinct neural signatures for the range of identified naturalistic behavior groups (Fig. 3a). Across behavioral groups,  
200 these population representations were quite robust and observable with both high and low resolution versions of B-SOiD  
201 (see Fig. S5 for detailed account of neural activity by group). More importantly, these clear population responses  
202 indicate the mathematically-established B-SOiD groupings reflect real distinctions at the level of neural representation.  
203 The strength of the aligned population responses largely coincided with actions involving the forelimbs, consistent  
204 with the recording location within motor cortex - [although this simple descriptor cannot broadly summarize the diverse  
205 dynamics discovered \(Supp. Fig. S5\)](#). We also noticed a trend for greater modulation for orientations in the direction  
206 contralateral to the recording (group 10) compared to ipsilateral (group 9), although some neurons were preferentially  
207 modulated for ipsilateral orienting ([Supp. Fig S6](#)). [While in-depth future analyses will be required to understand these  
208 responses, these data strongly support the quality of B-SOiD's clustering and its the potential for the study of the  
209 neurophysiology of unconstrained behaviors.](#)

210 In addition to these neural correlates of spontaneous behaviors, we observed that frameshifted data yielded a greater  
211 magnitude of neural modulation. The improved neural resolution was particularly pronounced just before and during  
212 the time of each action's onset. To quantify these differences for each neuron, we subtracted the magnitude of the low  
213 resolution activity from the magnitude of the higher resolution activity (e.g. positive values = stronger signal with high  
214 resolution frameshift method). Differences in signal quality across neurons and groups for individual neurons can be  
215 found in Fig S5. We then summed these [within-session](#) signal differences across all neurons, without any assumption  
216 whether a neuron was tuned to that behavior (tuned neurons should contribute to the sum, while untuned should have  
217 zero net effect). Higher temporal resolution yielded improved signal preceding behavioral onset across several actions  
218 groups (Fig. 3b) and on average across all segmented behaviors (Fig. 3c). Again, the largest differences were typically  
219 observed for actions involving forelimbs. This improvement is considerable taking into account the only difference  
220 between the data sets is a 50fps improvement in behavior onset resolution. The increase in signal strength yields an  
221 improved ability to detect more nuanced dynamics, and the duration of this improvement may be instructive as to the  
222 time course of motor planning in this population.

223 Several of the plots of the differences between high minus low resolution demonstrate a biphasic dynamic in which the

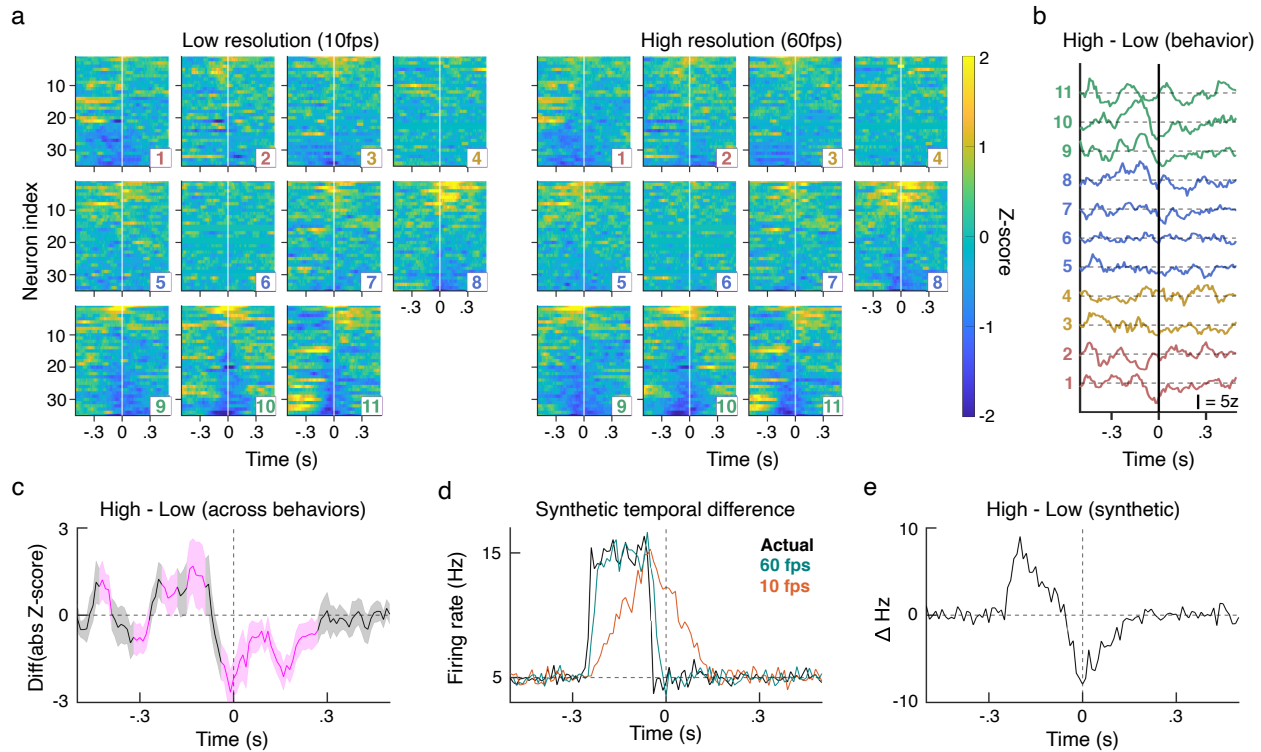

**Figure 3: Frameshifted high-temporal resolution improves identification of neural signatures at behavioral initiation.** (a) Z-scored neural activity aligned to the 11 B-SOid identified behaviors using either low temporal resolution, non-frameshifted (left) or high-resolution, frameshifted (right) alignment. Neurons and neuron order are the same for each pair of behavior panels. Detailed plots can be found in [Supp. Fig S5](#). (b) Total signal magnitude difference (high - low resolution) for each of the behaviors (1 on bottom). Reference bar = 5 z-score difference. (c) Mean and SEM of signal magnitude difference across all behaviors (magenta =  $p < 0.01$ , one sample t-test). Positive values indicate greater signal magnitude for high vs low temporal resolution. (d) Using simulated data, we measured the average firing rate with zero (Actual), high resolution (60fps), or low-resolution (10fps) temporal jitter introduced. 60fps produced a considerably more accurate account of the ground truth model. (e) Incorporating features from our recording data, the model produces similar high-low resolution difference dynamics to (c), here in a spiking artificial neuron.

224 quality of the high resolution signal is initially greater, then worse, than the low resolution signal. To better understand  
225 this dynamic, we modeled a simple neuron with a Poisson-distributed firing rate. This rate instantaneous increased  
226 from 5Hz to 15Hz. In our data and generally assumed for movement-related activity, we observed neural modulation  
227 occurring before movement onset and for relatively relatively short durations. Therefore the increase in synthetic  
228 activity was made 100ms long and began 130ms before onset. We then sampled the synthetic activity with 60fps  
229 and 10fps resolution onset jitter. Peri-event time histograms of the resulting signals demonstrate that 60fps behavior  
230 resolution yielded dramatically improved results that were quite close to the zero jitter ground truth (Fig. 3d). The  
231 resulting difference in observed signal between methods was similar to that observed in the population activity (Fig.  
232 3e). Specifically, we found the late improvement in low resolution signal to be the result of a delay in resolving the  
233 cessation of the activity increase. This rudimentary summary demonstrates that B-SOiD's increased action alignment  
234 resolution prevents both signal degradation and temporal displacement of neural activity pattern.

#### 235 **Comparison between top-down to bottom-up camera angles.**

236 To optimally extract limb 2D kinematics (e.g. stride length, horizontal limb speed), we have focused on a bottom-up  
237 camera setup. This arrangement also provides an ideal situation for tethered animals, eliminating problems caused by  
238 the cable tether. However, many research groups prefer to use or have existing data from top-down cameras placed  
239 above a cage or arena. Additionally, a transparent floor may alter behavior or induce anxiety<sup>47</sup>, and therefore may  
240 be suboptimal for some experiments. Using a session recorded simultaneously from above and below, we tested  
241 the performance of B-SOiD in different camera positions. For consistency, we used six points for the generation of  
242 both the bottom-up and top down B-SOiD prediction models (for top-down: top of snout, shoulders approximation,  
243 hips approximation, and tail-base were used). In this head-to-head comparison, B-SOiD extracted 8 behavior groups  
244 categories from top-down video. These groups largely mirrored with those identified with bottom-up video (sample  
245 ethogram Fig. 4a and category labels Fig. 4b; colors to group action types as in Figure 2). No new actions were  
246 found and some related action groups were combined (e.g. elevated and lower rearing were combined into one  
247 group). Unsurprisingly, we did observe some divergence in groups that relied upon precise paw localization (e.g.  
248 grooming-type behaviors), which is difficult to achieve when viewed from above. In these cases of misalignment,

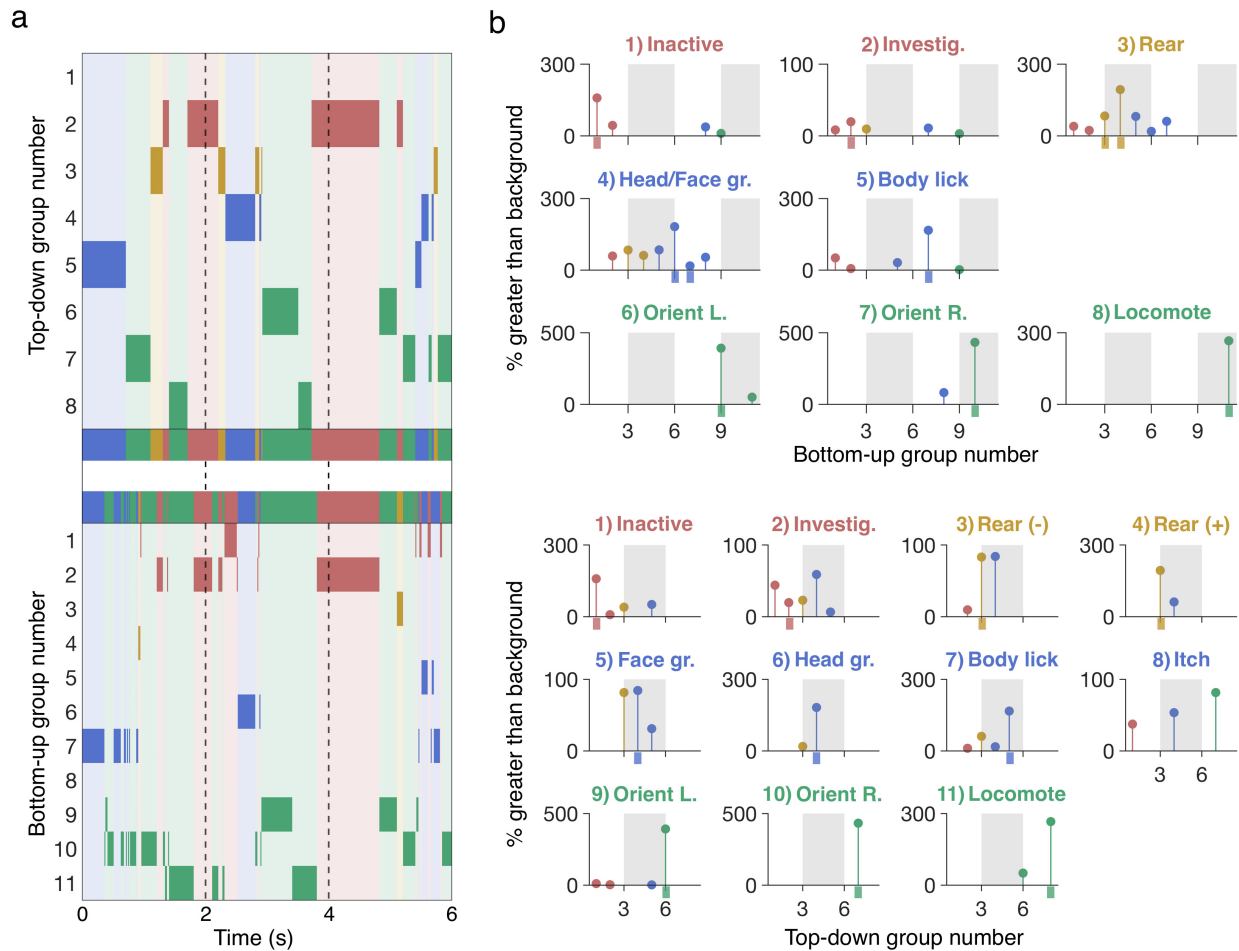

**Figure 4: Comparison of top-down to bottom-up camera angles.** (a) Example ethograms of concurrent behavioral segmentation from top-down view (top) and bottom-up view (bottom). The group definitions for the behavioral groups are as titled in b. (b) Top: To quantify the relationship between approaches, we mapped top-down video reference groups onto bottom-up target groups. Y-values indicate percentage of overlap greater than baseline distribution. Values < 0 not shown. Bottom: Same as top, but using bottom-up as reference and top-down as target. Colored tick mark indicates correct target group.



249 assignments typically defaulted to the most similar behavior type given the same amount of head movement but  
250 no information about paw position (see full kinematic properties for each group for direct comparison [https://github.com/runninghsus/bsoid\\_figs/blob/main/examples/README.md](https://github.com/runninghsus/bsoid_figs/blob/main/examples/README.md)).  
251

252 While the ethograms provide an overall sense of the quality of each method, we sought to determine the relationship  
253 between behavior segmentations using the different views. We determined the percent overlap for each view's action  
254 group, e.g. for frames identified as 'Orient Left', what is the relative distribution of bottom-up groups? After mapping  
255 each segmentation onto the target frames, we discovered that action groups are largely conserved between the camera  
256 angles, with top-down and bottom up groups correctly mapping onto each other at a rate of several hundred percent  
257 more than would be expected given the baseline distributions, effectively removing the bias for behaviors that happen  
258 more often (Fig. 4b). Therefore, while identical segmentation between the two camera angles is impossible, we suggest  
259 that both approaches are valid and demonstrate high inter-method consistency.

#### 260 **Comparison against alternative unsupervised pose estimation method**

261 To benchmark B-SOiD against the state-of-the art in unsupervised behavioral segmentation, we compared the  
262 performance of B-SOiD to MotionMapper on identical, bottom-up video data sets. The family of open source  
263 MotionMapper methods are the leading unsupervised method for behavior segmentation<sup>18</sup> and uses spectral information  
264 to discern behaviors. MotionMapper has a release that uses the same pose estimation input as B-SOiD ([https://github.com/DeepLabCut/DLCutils/tree/master/DLC\\_2\\_MotionMapper](https://github.com/DeepLabCut/DLCutils/tree/master/DLC_2_MotionMapper)), providing the means  
265 for a direct comparison. We made no assumption of ground truth for comparison; rather we focused our evaluation on  
266 the quality of the segmented behavior. We extracted and aligned frames of identical dimensions around the animal.  
267 For each bout we measured the motion energy of each pixel in the frames comprising that bout (the bright, constant  
268 background did not significantly contribute to motion energy), then computed the mean motion energy (ME) per  
269 behavioral group. Movement conserved across bouts will yield sharp and clear mean ME values. While the input data  
270 were identical, differences in the quality of groups were apparent. Compared to MotionMapper, summary images of  
271 B-SOiD groupings were more distinct from each other. Additionally, in several within-group panels, the average ME  
272

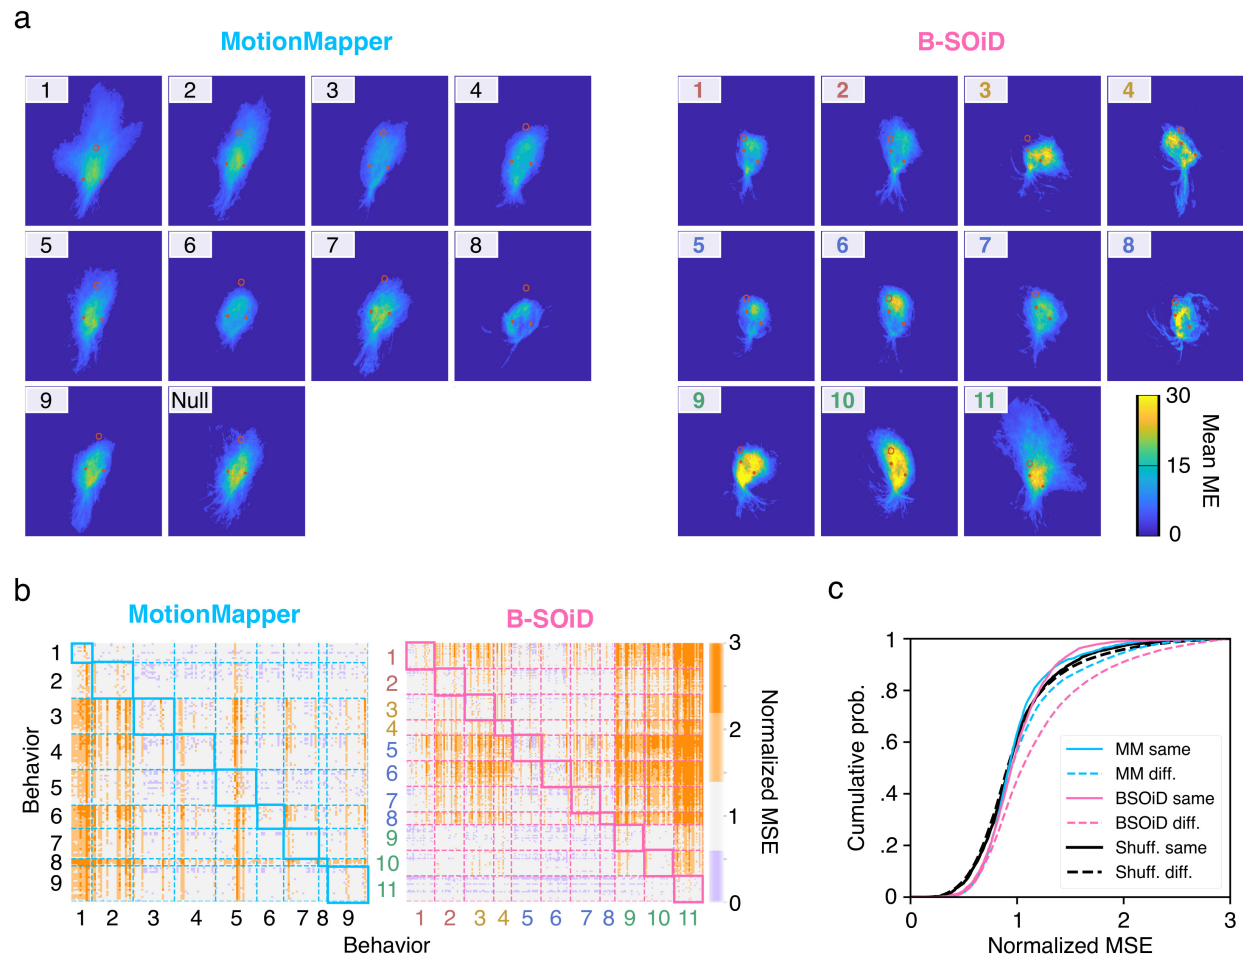

**Figure 5: Quantification of unsupervised segmentation algorithms** (a) Using the same pose estimation data, we selected up to 20 bouts from each behavioral group identified by either DLC\_2\_MotionMapper (left) or B-SOiD (right) to construct motion energy images - capturing the average amount of movement across bouts. Brighter colors indicate greater consistency in movement over the 300-600ms bouts. (b) To quantify the quality of these groupings, we determined the difference (MSE) in motion energy across every bout, normalizing every values along a row to that row's in-group mean MSE. Darker orange indicates greater differences between those pairs of bouts, e.g. 2 = twice the normalized MSE. (c) Cumulative histograms values in (b) for in-group ('same', solid line) and out-group ('diff', dashed line), as well as B-SOiD bouts shuffled into 11 random groups (black) to demonstrate a distribution without structure.

273 signal was clear enough that both limbs and group identities are visually apparent (Fig. 5a).

274 To quantify these differences, we computed the ME image mean squared error (MSE, see methods for details) for up  
275 to 20 randomly selected bouts per group. To reduce the effects of bout length, only bouts lasting 300-600ms were  
276 used; thus occasionally groups with only very short bouts were underrepresented. The unassigned noise group in  
277 MotionMapper was discarded for these analyses. The percent difference in MSE was then computed across in-group  
278 examples, providing an estimation of the in-group variability (Fig. 5b, in-group comparisons are contained within the  
279 diagonal, see Methods for details). Normalizing to the mean in-group values, percent differences in out-group values  
280 were also obtained. Darker colors indicate a greater difference in ME. Although some in-groups may exhibit greater  
281 differences in ME than others (e.g. locomotion vs inactivity), well-clustered bouts should be more different from out-  
282 than in-group bouts. We then summarized the differences across all groups (Fig. 5c). We also provide results from the  
283 same B-SOiD bouts, shuffled into randomly assigned groups, thus providing a baseline for structureless in-group and  
284 out-group variability to be expected.

285 The extent of divergence of out-group MSE (dashed line, 'diff') relative to in-group MSE (solid line, 'same'), is  
286 indicative of the quality of groupings - specifically how different a group is from the remaining population. Both  
287 algorithms demonstrated significant rightward shifts of their out-groups, but the effect was much more pronounced in  
288 the B-SOiD data (MotionMapper:  $p < 3e-12$ ; B-SOiD:  $p < 7e-111$ ; Shuffled:  $p = 0.60$ ). MotionMapper has constituted  
289 a pivotal advance, opening the door to unbiased analysis of the richness of unconstrained behavior. We recognize  
290 that the strength of the method lies in the ability to process spectral data from organisms with body components  
291 moving orthogonally to its center of mass, such as fruit flies. Thus, this pose-adapted method may benefit from greatly  
292 increasing the number of body positions identified, effectively providing similar spectral information. Finally, in the  
293 comparison of methods, we note that aspects MotionMapper are memory-limited, leading to roughly a 100X difference  
294 in processing time compared to B-SOiD with only six points. More points will exaggerate these differences. Some of  
295 this two-order of magnitude differences can be attributed to our integration of the novel UMAP technology rather than  
296 t-SNE (<https://umap-learn.readthedocs.io/en/latest/benchmarking.html>)

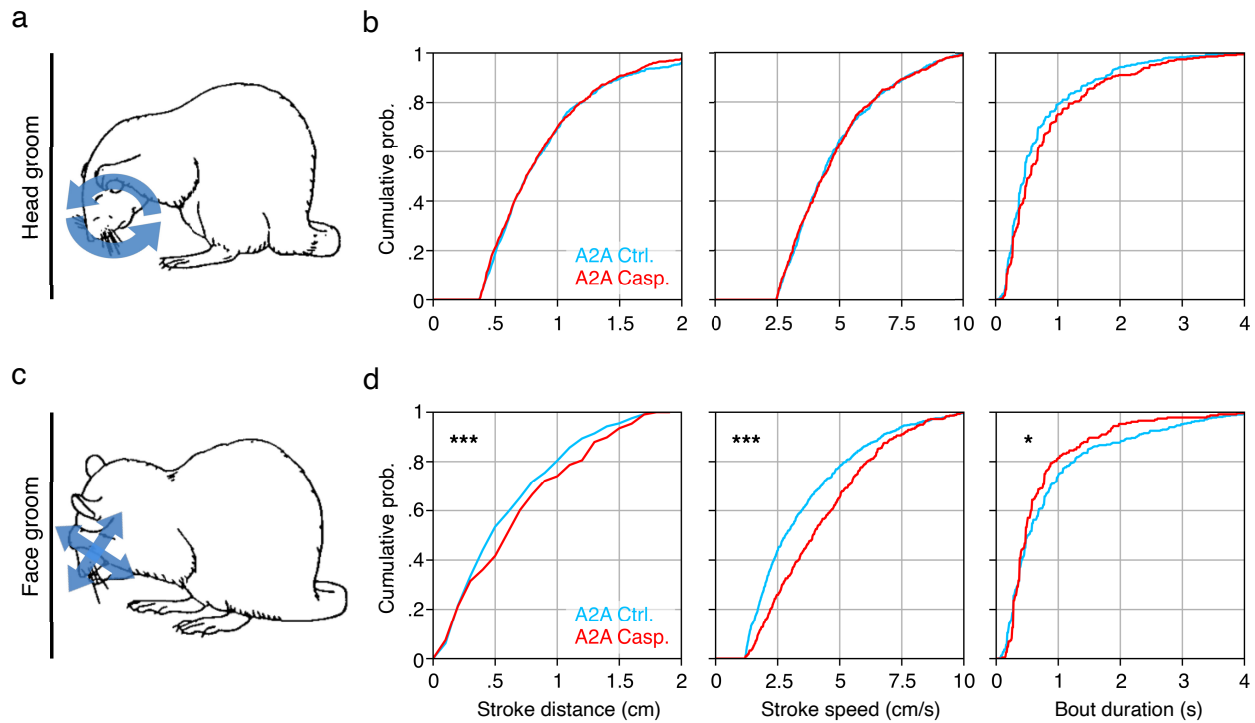

Figure 6: **Detection of robust, hard to detect kinematic changes in grooming behavior following cell-type specific lesion.** (a, c) Schematic of the two canonical groom types, (top) head and (bottom) face (image adapted from summary by Aldridge et al., 1990). (b, d) Cumulative histograms of groom stroke trajectory distance (left), peak groom stroke speed (middle), and groom bout duration (right), of the two corresponding groom types (control - blue; lesioned - red, N = 4 animals, one session each). \*  $p < 0.05$ , \*\*  $p < 0.001$ , \*\*\*  $p < 0.0001$ .

## 297 **Robust but typically unmeasurable kinematic changes resolved with B-SOiD**

298 To assess B-SOiD's real-world utility, we quantified grooming-type behaviors in mice with and without cell-type  
299 specific lesions of the indirect pathway of the basal ganglia (A2A-cre, with or without cre-dependent caspase virus  
300 injected into striatum, N = 4 mice each; [Supp Fig. S7](#)). The basal ganglia is thought to be involved in action selection  
301 and sequencing<sup>34,46</sup>, the dysfunction of which may give rise to diseases like OCD and Huntington's, in which unwanted  
302 actions occur, or occur too quickly<sup>48</sup>. Additionally, activation of the indirect pathway has been suggested to contribute  
303 to hypokinesia, or smaller and slower actions<sup>49</sup>. Importantly, methods for measuring these kinematic changes (e.g. limb  
304 speed and distance) across behaviors are largely absent, aside from locomotion. We first compared the individual strokes  
305 comprising bouts of head and face grooming. Consistent with a hypokinetic role, we found that **across all** animals  
306 lacking indirect pathway neurons **there was** a significant rightward shift in the speed and distance of face grooming,  
307 particularly pronounced for the smaller movements in the distribution (Fig. 6). However, these effects was not observed  
308 in the similar, but generally larger head grooming behavior. Current quantitative methods for grooming only provide  
309 bout duration and typically the canonical grooming types are combined because of technological limitations. Realizing  
310 these robust but hitherto indiscernible effects is made possible because of B-SOiD's ability to dissociate groom types,  
311 measure kinematics, and accurately identify the start and stop of bouts. We were also able to uncover other kinematic  
312 effects ([Fig. S8](#)), **including pronounced increases in itching speed. Locomotor stride length, but not stride speed was also**  
313 **significantly increased, providing a kinematic mechanism for previous seminal motor control work that observed gross**  
314 **locomotor hyperactivity following indirect pathway lesion**<sup>50</sup>. **The behavior-specific kinematic sensitivity demonstrated**  
315 **here** may provide the means to uncover deeper understanding in the fields of motor control, OCD, and pain<sup>48,51,52</sup>.

## 316 **Discussion**

317 Naturalistic, **unconstrained** behavior provides a rich account of an animal's motor decisions and repertoire. Until recently,  
318 capturing these **movements** with precision and accuracy was prohibitive, as evidenced in part by the relative lack of  
319 computational ethology studies (<sup>53</sup>). Still, **position does not equal behavior. Rather, it is the stereotyped spatiotemporal**  
320 **patterns of these positions that yield behavior.** Our unsupervised algorithm, B-SOiD, captures the inherent statistics of

321 limb and action dynamics with off-the-shelf technology and a simple user interface. This tool serves as the vital bridge  
322 between recent breakthroughs in establishing the position of body parts<sup>12,28</sup> and the [conserved patterns of positions we](#)  
323 [call](#) behaviors. It also demonstrates the utility and potential of pairing unsupervised spatiotemporal pattern extraction  
324 with supervised machine learning classifier in behavioral assessment. It is the patterns in pose relationships that are  
325 discovered, extracted, and used to inform the ML classifier, thus mathematically tailoring the tool to the subject's  
326 inherent behaviors and eliminating top-down user bias.

327 [In addition to providing a tool that can be used on any position data, we provide a glimpse into its potential. In part](#)  
328 [enabled by the improved temporal resolution, we were able to align action onsets with cortical activity, uncovering](#)  
329 [neural dynamics that reflected the changing behaviors. The greater resolution also provides increased sensitivity to](#)  
330 [detect brief behaviors and the individual components of those movements. In particular, we resolved kinematic changes](#)  
331 [of individual limb strokes \(grooming, itching, locomotion\) in a lesion model. The ability to decompose behaviors](#)  
332 [into their constituent movements is a key feature. Because B-SOiD uses limb position, it extracts not only the action](#)  
333 [performed, but also kinematics \(stride speed, paw trajectory, etc\). While recent work has benefited from access to such](#)  
334 [performance parameters<sup>26,54</sup>, it stands to be an even more potent advantage in the study of disease models. Obsessive](#)  
335 [compulsive disorder research in particular has long sought improved identification and quantification of grooming](#)  
336 [behavior<sup>43,55,56</sup>. Pain and itch research has also sought to achieve similar ends<sup>52</sup>. These results point to the need for a](#)  
337 [deeper comprehension of the composite kinematics forming those actions, as many current methods are limited to only](#)  
338 [the duration of such actions.](#)

339 A unique advantage of the classifier built on these pose-relationships is [computational ease](#). First, the open source  
340 [package provides a platform that is accessible to biologists without extensive coding knowledge nor computational](#)  
341 [resources \(e.g. expensive GPUs\). Next, the classifier provides greater flexibility, allowing a single trained model to be](#)  
342 [generalized across subjects, labs, or frames with minor positioning errors. This ability is fundamental deliverable of the](#)  
343 [machine learning integration. The random forest classifier is trained on pose relationships, extracting the conserved,](#)  
344 [essential features while also recognizing those features with high variability. The classifier then predict the likeliest](#)  
345 [label given all of the features, eliminating the potential concerns that are inherent in non-linear transformations. Finally,](#)

346 the speed afforded by using a classifier, rather than clustering, to segment behavior leaves open the door to perform  
347 closed-loop manipulations through real-time segmentation<sup>57</sup>.

348 To discover the clusters on which the classifier is built, B-SOiD uses UMAP, which is both more computationally  
349 effective and faster than similar methods like t-SNE<sup>31</sup>. While both methods preserve the local structure, UMAP preserves  
350 the "global structure", or long-distance embedding placement of the dimensionally reduced space. Said another way,  
351 UMAP can enable the determination of whether point 1 is closer to point 2 or 3. These advances may be useful for future  
352 development and interpretability. The improved stability and speed of pose to re-embedding enables segmentation at  
353 speeds greater than most camera framerates. Additionally, B-SOiD needn't be restricted to segmenting behaviors based  
354 only on pose-relationships. High-dimensional, unsupervised segmentation may also be able to integrate multi-model  
355 signals such as acoustics, environmental stimuli, or multi-animal social interactions.

356 .

357 **Acknowledgements** We would like to acknowledge to acknowledge Mary Cundiff and Aryn Gittis for providing  
358 A2A lesion animals. Reaching data acquired by Alexandra Bova in the laboratory of Daniel Leventhal (University of  
359 Michigan and VA Ann Arbor Health System). Joshua Shaevitz provided fly data processed by Talmo Pereira in the  
360 laboratory of Mala Murthy (Princeton University) We also thank Alexander Hodge, Mark Nicholas, Nahom Mossazghi  
361 and Andrew Buzza for data processing assistance, Andreas Pfenning and Sarah Ross (University of Pittsburgh) provided  
362 insightful comments. This work was supported by the Brain Research Foundation Fay/Frank Seed Grant and the  
363 Pennsylvania Department of Health.

364 **Author Contributions** AIH acquired and analyzed the data, conceived the algorithmic advancements, created the  
365 software and drafted the manuscript. EAY conceived the study, analyzed and interpreted the data, and drafted the  
366 manuscript.

367 **Declaration of Interests** The authors declare that they have no competing financial interests.

## 368 **Methods**

369 Here we explain the in vivo behavioral and electrophysiological measurements, and then proceed to the computational  
370 techniques underlying the algorithm and further analyses. A processing diagram can be found in Supp. Fig. S1. For  
371 bout duration in Fig. 1c, model cross-validated accuracy in Fig. 2c, and frameshift coherence in Fig. 2f, box-plot  
372 elements carry the standard definitions(e.g. center line, median; box limits, upper and lower quartiles; whiskers, 1.5x  
373 interquartile range; points, outliers)

### 374 **Behavioral subjects and experimental set-up.**

375 For normal, non-lesion experiments (Figs. 2, 4, 5), subjects were six, adult C57BL/6 mice (3 females, Jackson  
376 Laboratory). The single brown mouse shown in Figure 2a, is one of those six mice, and is an example of the diversity  
377 of the C57BL/6 line, specifically the substrain 6N (NIH) lineage, which can produce brown fur. Individual animals  
378 were placed in a clear, 15 x 12 inch rectangular arena for one hour while a 1280x720p video-camera captured video at  
379 60Hz (cluster and ML) or 200Hz (frameshift). Following each data session, any feces were cleaned out and the arena  
380 was thoroughly sprayed and wiped down with Virkon S solution. The arena was then allowed to dry and air out for  
381 several minutes. This video was acquired from below, 19 inches under the center of the field. Offline analysis was  
382 performed in either Python or MATLAB (MathWorks). Unless otherwise mentioned, all statistical measures of behavior  
383 were non-parametric, two-tailed Kolmogorov-Smirnov tests and all error bars are the standard error of the mean. All  
384 animals were handled in accordance with guidelines approved by the Carnegie Mellon Institutional Animal Care and  
385 Use Committee (IACUC).

### 386 **Electrophysiology.**

387 To demonstrate differences in temporal resolution (Fig. 3), we recorded during one open field session from layer 5  
388 of forelimb area of motor cortex (0.50mm anterior, 1.75mm lateral of Bregma, z=950um) in one *Drd1a-cre x ai32* on  
389 C57BL/6 background female mouse using a 64-channel silicon electrode chronically implanted in aseptic conditions  
390 (Cambridge Neurotechnology). Signals were sampled at 30kHz with Open Ephys hardware. Spikes were high-pass  
391 filtered and sorted offline using Kilosort2 (<https://github.com/MouseLand/Kilosort2>). Activity across



392 bouts aligned to onset of each behavior. To enable comparison across neurons, each neuron's average activity was  
393 binned (10ms) and z-scored over the interval -1s to 2s relative to onset. Neural activity in Fig. 3 was z-scored across  
394 all instances of that action and are rank ordered according to the average low resolution activity during the 200 ms  
395 prior to alignment time. This rank order was used for both panels of a given behavior. The neurons in Fig. S5 are not  
396 rank sorted, but are consistent across panels so as to facilitate comparison across panels. Similarly, z-scoring across all  
397 panels incorporated all bouts identified with at the given resolution. A sliding boxcar with a semi-width of 3 bins was  
398 applied to activity visualizations. Randomly sampled data was achieved by taking the same number of instances of each  
399 action within the session and distributing this number of alignment times throughout the session. PSTHs were then  
400 generated with those alignments in the same manner (Fig. S4).

#### 401 **Extraction of kinematics.**

402 Individual strides and grooms were identified, and the speed of the stroke quantified, by using the MATLAB function  
403 *findpeaks()* on the speed of the right forepaw, with the troughs serving as the start/stop of each movement. Average  
404 groom distance was computed as the euclidean distance of right forepaw displacement per stroke averaged amongst all  
405 head groom bouts.

#### 406 **Indirect pathway cell-type specific lesion experiment.**

407 Eight adult Adora2a-cre (often called A2A, Jackson Laboratory stock #036158, four females, C57BL/6 background)  
408 mice were used to study the effects of cell-type specific lesion of striatal indirect pathway neurons. Half of these animals  
409 (two females) were injected with AAV2-flex-taCasp3-TEVP<sup>58</sup>  $4 \times 10^{12}$  vg/mL from UNC Vector Core bilaterally into  
410 the dorsomedial striatum: AP +0.9, ML +/-1.5, DV -2.65. Animals were allowed to recover at least 14 days prior to  
411 open-field experiments. The virus is designed to kill only cells expressing cre recombinase. To help visualize virus  
412 spread, a non-Cre dependent GFP virus, AAV2-CAG-GFP  $4 \times 10^{12}$  was co-injected. 1 $\mu$ L in each hemisphere was  
413 injected with a virus ratio of 2:1, Casp:GFP and a rate of 200nL/min. The GFP virus was added because the cre-positive  
414 cells will be killed as a result of the caspase virus injection, leaving the many cre-negative cells behind (Supp. Fig. S7).  
415 Thus the location of gross cell loss is difficult to quantify otherwise (GFP - green, foxp11 counterstain - red, overlap -

416 green). Expression of GFP is restricted to the striatum. Quantifying decreased cell density by eye also produced similar  
417 lesion maps (not shown).

#### 418 **DeepLabCut training and model availability**

419 For pose-estimation, we used the aforementioned six-body part model trained on a total of 7,881 frames (at least  
420 50 frames for all sessions, 69 total sessions, N=21 animals). The training regimen was set to the DeepLabCut  
421 default<sup>12</sup> and trained for 1.03 million iterations, achieving a loss of  $\approx 0.002$ . The weights of the neural  
422 network are open sourced and freely available [https://github.com/YttriLab/B-SOiD/tree/master/](https://github.com/YttriLab/B-SOiD/tree/master/yttri-bottomup_dlc-model/dlc-models)  
423 [yttri-bottomup\\_dlc-model/dlc-models](https://github.com/YttriLab/B-SOiD/tree/master/yttri-bottomup_dlc-model/dlc-models).

#### 424 **Data processing feature extraction.**

425 With increasing sampling frequency, the intra-frame differences that are critical to determining the spatiotemporal  
426 features (e.g. speed) diminish. For instance, 60fps sampling provides an inter-frame interval of only 16.7 ms - relegating  
427 the changes in position to a similar magnitude to the jitter in the position signal itself. To improve the signal-to-noise  
428 ratio, B-SOiD downsamples all input to non-overlapping 10fps (100ms) windows, and then either sums (displacement,  
429 angular change) or averages (distance) over all 10fps samples. Thus, for the six points used in our mouse data, the  
430 per-frame spatiotemporal features consisted of 15 displacement ( $D$ ) and angular change ( $\Theta$ ) measures, and six distances  
431 ( $L$ ). This process is described in Algorithm 1 and the process pipeline diagram (Fig S1). In addition, these features are  
432 then smoothed over, or averaged across, a sliding window of size equivalent to  $\sim 60$  ms (30 ms prior to and after the  
433 frame of interest). This is important for distinguishing the pose estimate jitter from finer movements that the animal  
434 makes, such as the different groom types.

---

**Algorithm 1:** Feature extraction for  $N$  pose estimates

---

Initialize, for  $m = 1$  to  $\binom{N}{2}$ :

$L(m) \leftarrow 0$

$\Theta(m) \leftarrow 0$

**for**  $m = 1, M$  **do**

$m \leftarrow$  any pair of pose  $n$  and  $\neq n$

    Store  $\|(n_{m1}, n_{m2})\|^2$  in  $L(m)$

**for**  $t = 1, T - 1$  **do**

        Store  $\arccos[(L(m)_{t+1} \times L(m)_t) / (\|L(m)_{t+1}\| \cdot \|L(m)_t\|)]$  in  $\Theta(m)$

**end for**

    Discard the first index of  $L(m)$

435

**end for**

Initialize, for  $n = 1$  to  $N$ :

$D(n) \leftarrow 0$

**for**  $n = 1, N$  **do**

$n \leftarrow$  2D pose estimate

**for**  $t = 1, T - 1$  **do**

        Store  $\|(n_{t+1}, n_t)\|^2$  in  $D(n)$

**end for**

**end for**

**return**  $L, \Theta, D$

---

436 **Dimensionality reduction with UMAP.**

437 B-SOiD then projects the computed pose relationships ( $D$ ,  $\Theta$ , and  $L$ ) into a low-dimensional space, which facilitates  
438 behavioral identification without simplifying the data complexity. In simpler terms, similar mouse multi-joint trajectory  
439 will retain its similarity visualized in the low-dimensional space. B-SOiD achieves this through UMAP, a state-of-the-art  
440 algorithm that utilizes Riemannian geometry to represent real world data with the underlying assumptions of the  
441 algebraic topology<sup>31</sup>. UMAP is chosen over the popular t-SNE for its advantage in computational complexity,

442 outlier distinction, and most importantly, preservation of longer-range pairwise distance relationships<sup>31,36,59–61</sup>.  
443 Dimensionality reduction was implemented in the  step in B-SOiD UI. Embedded in this step  
444 is a python implementation of `umap-learn v.0.4.x` (<https://github.com/lmcinnes/umap>). Since  
445 our goal is to use UMAP space for clustering, we enforced the following UMAP parameters: (`n_neighbours`  
446 `= 60`, `min_dist = 0.0`, euclidean distance metric). In terms of `n_components`, we call python  
447 implementation of `decomposition.PCA()` from `scikit-learn v.0.23.x` ([https://github.com/](https://github.com/scikit-learn/scikit-learn)  
448 [scikit-learn/scikit-learn](https://github.com/scikit-learn/scikit-learn)) and set `n_components` to explain  $\geq 0.7$  of total pose-estimation variance.

#### 449 **Identify group assignments with HDBSCAN.**

450 UMAP embeddings were then clustered through HDBSCAN algorithm<sup>32</sup>. It is particularly useful for UMAP outlier  
451 detections as it recognizes subthreshold densities. HDBSCAN assignments was implemented in the   
452 step in B-SOiD UI. Embedded in this step is a python implementation of `hdbscan v.0.8.x` ([https://github.](https://github.com/scikit-learn-contrib/hdbscan)  
453 [com/scikit-learn-contrib/hdbscan](https://github.com/scikit-learn-contrib/hdbscan)). To enable maximum flexibility in determining the number of  
454 behavioral groups the method creates, we enabled user input for HDBSCAN parameter `min_cluster_size`.

#### 455 **Random forest classifier for accurate and fast prediction.**

456 Random forest classifier design was chosen for high-dimensional pose relationships mapping to discrete  
457 multi-class behaviors. In addition, it has been suggested that Random forest has the ability to accurately  
458 learn the low-dimensional embedding from the high-dimensional features<sup>36</sup>. Random forest was implemented  
459 in the  step in B-SOiD UI. Embedded in this step is a python  
460 implementation of `ensemble.RandomForestClassifier()` from `scikit-learn v.0.23.x` ([https:](https://github.com/scikit-learn/scikit-learn)  
461 [//github.com/scikit-learn/scikit-learn](https://github.com/scikit-learn/scikit-learn)). We set the parameters to default, as it was sufficient for  
462 learning the mapping.

463 **Frameshift prediction paradigm.**

464 Many end users may wish to apply the algorithm to higher frame-rate video. Because B-SOiD applies a temporal  
465 constraint of  $\sim 10$ fps to maintain an optimal signal-to-noise ratio (which can be adjusted by tricking the UI in input  
466 frame-rate), we designed B-SOiD to predict along a sliding window. This is mathematically implemented using offsets,  
467 pseudocode in Algorithm 2.

---

**Algorithm 2:** Frameshift implementation for  $F$  times higher sampling rate than 10fps

---

Initialize behavioral array:

$G \leftarrow 0$

Initialize downsampled behavioral array, for  $f = 1$  to  $F$ :

$g(f) \leftarrow 0$

**for**  $f = 1, F$  **do**

468 | Start at  $f$ , sample pose-relationships  $s$  at 10fps

| **for**  $s = 1, S$  **do**

| | Store the prediction ( $g | s$ ) in  $g(f)$

| **end for**

| Insert  $g(f)$  at every  $F^{th}$  position in  $G$  starting at  $f$

**end for**

**return**  $G$

---

469 In Fig. 2f, to accurately quantify the consistency between predicted frameshifted  $G$  and the non-frameshifted  $g(f)$   
470 (annotation described in Algorithm 2, we upsampled  $g(f)$  with the same values prior. To demonstrate the input  
471 flexibility of B-SOiD with a high speed camera, our frameshift example in Fig. 2f was 200fps. Given no evidence for  
472 improvement beyond 50fps, all other analyses were 60fps at resolution.

473 We recognize that spurious labeling could arise due to jitter. Although segmentation is applied independently to each  
474 frame, we assume some level of continuity of actions. As such, we discarded any frameshifted bout that was not at  
475 least three samples ( $> 50$ ms) in duration where applicable (Fig. 3 and 4; Fig. 5 used a 300ms lower bound and when  
476 set lower, the inclusion of shorter durations only improved B-SOiD relative to MotionMapper; the data in Fig. 6 was

477 devoid of < 50ms bouts). In Fig. 3, non-frameshift was comprised of 10,433 bouts with a mean of 948 bouts/group;  
478 frameshift was comprised of 17,129 bouts with a mean of 1,557 bouts/group. Given 11 groups, the probability of the  
479 random jitter event occurring and being repeated three times is less than one percent. We note that the addition of  
480 this conservative approach did not qualitatively change any findings, and that each datapoint itself is the summary of  
481 several segmentations across the 100ms frameshift window. Although this duration cutoff is in line with other mouse  
482 behavioral work, our motivation was more mathematical and less a statement on any psychophysical assumptions. As  
483 demonstrated in the 300fps rat reach-to-grasp data, B-SOiD as a tool can be titered to preferentially segment whole  
484 actions or their sub-actions. Additionally, some actions (e.g. saccades during reading) have durations as low as 20ms. A  
485 human can deliver as many as 20 punches in a single second. As such, B-SOiD does not enforce any limits on duration,  
486 allowing the user to determine the pertinent timescales and appropriate interpretations.

#### 487 **Integration of low-confidence pose estimates**

488 The occlusion of a point from view can be informative (e.g during a rear, the snout is often occluded by the body when  
489 viewed from below), but a missing point can be the result of poor pose estimation on a given frame. The certainty of each  
490 frame's pose estimation is provided by most pose estimation software in the form of prediction confidence/likelihood  
491 values. In all data sets, we observed a bimodal distribution comprised of either very high or low confidence values.  
492 To bisect the two distributions with each session, B-SOiD designates all points with a confidence score below the  
493 elbow point (difference (high - low) between adjacent likelihood becomes positive) of the probability. We remove these  
494 low-confidence points and substitute that position with last high-confidence position. Thus, the displacement between  
495 frames for a low-confidence point is zero. It should be noted that even when stationary, pose estimation programs do  
496 not output identical positions in consecutive frames.

497 Low confidence estimations can occur from a missing body part (e.g. from being behind another body part) or poor  
498 prediction (e.g. blurry video or inconsistent lighting). In the latter case, the aberrations which led to the low-confidence  
499 points are typically short lived, often only a single frame, and are fully mitigated by averaging over the 100ms  
500 frameshifting interval. Prolonged low-confidence points contribute a spatiotemporal signature, and if repeated as a

501 behavior, may be part of an identified spatiotemporal pattern (either in training or prediction). The occlusion of the snout  
502 during rear(+) is one example. Importantly, occasional prolonged aberrations do not adversely affect the algorithm.  
503 During training, spurious omissions will be too variable to constitute a conserved pattern - and the added variability  
504 may make the random forest even more robust. During prediction, the trained model utilizes 36 spatiotemporal features,  
505 minimizing the effect of a pose estimation error. This ability to incorporate patterned omissions and overcome spurious  
506 errors is another benefit of adding the trained classifier following the clustering.

### 507 **Motion energy image mean-squared-error**

508 The term "motion energy" that we had mentioned was introduced by Stringer et al., where "Motion energy, computed as  
509 the absolute value of the difference of consecutive frames"<sup>62</sup>. Since the animal is freely moving in the environment,  
510 starting pose alignment is necessary. Following image registration using estimated outline of animal at the start of each  
511 identified behavior, we compute the motion energy (ME, absolute value of the difference of all consecutive frames)  
512 using MATLAB command `imshowpair`, capped at 600ms for conciseness. We then performed weighted averaging  
513 for each bout to reconstruct a single ME image. In other words, each pixel in such reconstructed ME image represents  
514 the average absolute difference between consecutive frames at a given pixel location. Since there are multiple instances  
515 of each action, we want to see if such animal-centric average absolute difference is conserved between instances.  
516 To quantify consistency, we performed all pair-wise image mean-squared-error using MATLAB command `immse`.  
517 Essentially, the pixel difference between instances (ME images) will be coalesced into a single value (MSE). MSE is  
518 inversely proportional to consistency of animal movement for each identified action.

### 519 **Data availability.**

520 All data used in this manuscript can be found at [https://github.com/ YttriLab/openfield\\_data](https://github.com/YttriLab/openfield_data) .

### 521 **Code availability.**

522 Our DeepLabCut network, analysis code, as well as the data used to create these figures, are all open sourced and freely  
523 available from GitHub <https://github.com/YttriLab/B-SOID>, including a similar version of the code for

524 [MATLAB](#), though this version is simpler and uses t-SNE for dimensionality reduction.



## 525 References

- 527 1. Gallistel, C. R. Representations in animal cognition: An introduction. *Cognition* (1990).  
526
- 528 2. Krakauer, J. W., Ghazanfar, A. A., Gomez-Marin, A., MacIver, M. A. & Poeppel, D. Neuroscience Needs Behavior:  
529 Correcting a Reductionist Bias (2017).
- 530 3. Tanaka, S., Young, J. W., Halberstadt, A. L., Masten, V. L. & Geyer, M. A. Four factors underlying mouse behavior  
531 in an open field. *Behavioural Brain Research* **233**, 55–61 (2012).
- 532 4. Van Lier, H., Coenen, A. M. & Drinkenburg, W. H. Behavioral transitions modulate hippocampal  
533 electroencephalogram correlates of open field behavior in the rat: Support for a sensorimotor function of  
534 hippocampal rhythmical synchronous activity. *Journal of Neuroscience* **23**, 2459–2465 (2003).
- 535 5. Pearson, J. M., Watson, K. K. & Platt, M. L. Decision making: The neuroethological turn (2014).
- 536 6. Noldus, L. P., Spink, A. J. & Tegelenbosch, R. A. Computerised video tracking, movement analysis and behaviour  
537 recognition in insects. *Computers and Electronics in Agriculture* **35**, 201–227 (2002).
- 538 7. Jhuang, H. *et al.* Automated home-cage behavioural phenotyping of mice. *Nature Communications* **1** (2010).
- 539 8. Kabra, M., Robie, A. A., Rivera-Alba, M., Branson, S. & Branson, K. JAABA: Interactive machine learning for  
540 automatic annotation of animal behavior. *Nature Methods* **10**, 64–67 (2013).
- 541 9. Weissbrod, A. *et al.* Automated long-term tracking and social behavioural phenotyping of animal colonies within a  
542 semi-natural environment. *Nature Communications* **4** (2013).
- 543 10. Le, V. A. & Murari, K. Recurrent 3D Convolutional Network for Rodent Behavior Recognition. In *ICASSP, IEEE*  
544 *International Conference on Acoustics, Speech and Signal Processing - Proceedings*, vol. 2019-May, 1174–1178  
545 (Institute of Electrical and Electronics Engineers Inc., 2019).
- 546 11. van den Boom, B. J., Pavlidi, P., Wolf, C. J., Mooij, A. H. & Willuhn, I. Automated classification of self-grooming  
547 in mice using open-source software. *Journal of Neuroscience Methods* **289**, 48–56 (2017).

- 548 12. Mathis, A. *et al.* DeepLabCut: markerless pose estimation of user-defined body parts with deep learning. *Nature*  
549 *Neuroscience* (2018).
- 550 13. Sturman, O. *et al.* Deep learning-based behavioral analysis reaches human accuracy and is capable of outperforming  
551 commercial solutions. *Neuropsychopharmacology* 1–11 (2020).
- 552 14. von Ziegler, L., Sturman, O. & Bohacek, J. Big behavior: challenges and opportunities in a new era of deep  
553 behavior profiling. *Neuropsychopharmacology* 1–14 (2020).
- 554 15. Berman, G. J., Choi, D. M., Bialek, W. & Shaevitz, J. W. Mapping the stereotyped behaviour of freely moving fruit  
555 flies. *Journal of The Royal Society Interface* **11**, 20140672 (2014).
- 556 16. Berman, G. J., Bialek, W. & Shaevitz, J. W. Predictability and hierarchy in *Drosophila* behavior. *Proceedings of*  
557 *the National Academy of Sciences of the United States of America* **113**, 11943–11948 (2016).
- 558 17. Cande, J. *et al.* Optogenetic dissection of descending behavioral control in *Drosophila*. *eLife* **7** (2018).
- 559 18. Todd, J. G., Kain, J. S. & de Bivort, B. L. Systematic exploration of unsupervised methods for mapping behavior.  
560 *Physical Biology* **14**, 015002 (2017).
- 561 19. Robie, A. A. *et al.* Mapping the Neural Substrates of Behavior. *Cell* **170**, 393–406 (2017).
- 562 20. Stephens, G. J., Johnson-Kerner, B., Bialek, W. & Ryu, W. S. Dimensionality and Dynamics in the Behavior of *C.*  
563 *elegans*. *PLoS Computational Biology* **4**, e1000028 (2008).
- 564 21. Liu, M., Sharma, A. K., Shaevitz, J. W. & Leifer, A. M. Temporal processing and context dependency in  
565 *caenorhabditis elegans* response to mechanosensation. *eLife* **7** (2018).
- 566 22. Vogelstein, J. T. *et al.* Discovery of brainwide neural-behavioral maps via multiscale unsupervised structure  
567 learning. *Science* **344**, 386–392 (2014).
- 568 23. Wiltschko, A. B. *et al.* Mapping Sub-Second Structure in Mouse Behavior. *Neuron* **88**, 1121–1135 (2015).
- 569 24. Mazzone, P., Hristova, A. & Krakauer, J. W. Why don't we move faster? Parkinson's disease, movement vigor, and  
570 implicit motivation. *Journal of Neuroscience* **27**, 7105–7116 (2007).

- 571 25. MacNeil, L. K. & Mostofsky, S. H. Specificity of dyspraxia in children with autism. *Neuropsychology* **26**, 165–171  
572 (2012).
- 573 26. Darmohray, D. M., Jacobs, J. R., Marques, H. G. & Carey, M. R. Spatial and Temporal Locomotor Learning in  
574 Mouse Cerebellum. *Neuron* **102**, 217–231 (2019).
- 575 27. Nath, T. *et al.* Using DeepLabCut for 3D markerless pose estimation across species and behaviors. *Nature Protocols*  
576 (2019).
- 577 28. Pereira, T. D. *et al.* Fast animal pose estimation using deep neural networks. *Nature Methods* **16**, 117–125 (2019).
- 578 29. Cao, Z., Hidalgo Martinez, G., Simon, T., Wei, S.-E. & Sheikh, Y. A. OpenPose: Realtime Multi-Person 2D Pose  
579 Estimation using Part Affinity Fields. *IEEE Transactions on Pattern Analysis and Machine Intelligence* 1–1 (2019).
- 580 30. Simon, T., Joo, H., Matthews, I. & Sheikh, Y. Hand Keypoint Detection in Single Images using Multiview  
581 Bootstrapping. *Proceedings - 30th IEEE Conference on Computer Vision and Pattern Recognition, CVPR 2017*  
582 **2017-Janua**, 4645–4653 (2017).
- 583 31. McInnes, L., Healy, J. & Melville, J. UMAP: Uniform Manifold Approximation and Projection for Dimension  
584 Reduction (2018).
- 585 32. Campello, R. J., Moulavi, D. & Sander, J. Density-based clustering based on hierarchical density estimates. In  
586 *Lecture Notes in Computer Science (including subseries Lecture Notes in Artificial Intelligence and Lecture Notes*  
587 *in Bioinformatics)*, vol. 7819 LNAI, 160–172 (Springer, Berlin, Heidelberg, 2013).
- 588 33. Klaus, A. *et al.* The Spatiotemporal Organization of the Striatum Encodes Action Space. *Neuron* (2017).
- 589 34. Aldridge, J. W., Berridge, K. C. & Rosen, A. R. Basal ganglia neural mechanism of natural movement sequences.  
590 In *Canadian Journal of Physiology and Pharmacology*, vol. 82, 732–739 (2004).
- 591 35. Aldridge, J. W., Berridge, K. C., Herman, M. & Zimmer, L. Neuronal Coding of Serial Order: Syntax of Grooming  
592 in the Neostriatum.

- 593 36. Becht, E. *et al.* Dimensionality reduction for visualizing single-cell data using UMAP. *Nature Biotechnology* **37**,  
594 38–47 (2019).
- 595 37. Diaz-Papkovich, A., Anderson-Trocmé, L., Ben-Eghan, C. & Gravel, S. UMAP reveals cryptic population structure  
596 and phenotype heterogeneity in large genomic cohorts. *PLoS Genetics* **15**, e1008432 (2019).
- 597 38. Berman, G. J. Measuring behavior across scales (2018).
- 598 39. Hsu, A. I. & Yttri, E. A. B-SOiD: An Open Source Unsupervised Algorithm for Discovery of Spontaneous  
599 Behaviors. *bioRxiv* (2019).
- 600 40. Luxem, K., Fuhrmann, F., Kürsch, J., Remy, S. & Bauer, P. Identifying Behavioral Structure from Deep Variational  
601 Embeddings of Animal Motion. *bioRxiv* 2020.05.14.095430 (2020).
- 602 41. Dolensek, N., Gehrlach, D. A., Klein, A. S. & Gogolla, N. Facial expressions of emotion states and their neuronal  
603 correlates in mice. *Science* **368**, 89–94 (2020).
- 604 42. Ebbesen, C. L. & Froemke, R. C. Automatic tracking of mouse social posture dynamics by 3D videography, deep  
605 learning and GPU-accelerated robust optimization. *bioRxiv* 2020.05.21.109629 (2020).
- 606 43. Kalueff, A. V. *et al.* Neurobiology of rodent self-grooming and its value for translational neuroscience (2016).
- 607 44. Berridge, K. C., Fentress, J. C. & Parr, H. Natural syntax rules control action sequence of rats. *Behavioural brain*  
608 *research* **23**, 59–68 (1987).
- 609 45. Bartkova, K. & Jouviet, D. Impact of frame rate on automatic speech-text alignment for corpus-based phonetic  
610 studies. In *ICPhS'2015-18th International Congress of Phonetic Sciences* (2015).
- 611 46. Markowitz, J. E. *et al.* The Striatum Organizes 3D Behavior via Moment-to-Moment Action Selection. *Cell* **174**,  
612 44–49 (2018).
- 613 47. Owen, K., Thiessen, D. D. & Lindzey, G. Acrophobic and photophobic responses associated with the albino locus  
614 in mice. *Behavior Genetics* **1**, 249–255 (1970).

- 615 48. Rapoport, J. L. & Wise, S. P. Obsessive-compulsive disorder: evidence for basal ganglia dysfunction.  
616 *Psychopharmacology bulletin* **24**, 380–4 (1988).
- 617 49. Albin, R. L., Young, A. B. & Penney, J. B. The functional anatomy of basal ganglia disorders. *Trends in*  
618 *Neurosciences* **12**, 366–375 (1989).
- 619 50. Sano, H. *et al.* Conditional ablation of striatal neuronal types containing dopamine D2 receptor disturbs coordination  
620 of basal ganglia function. *Journal of Neuroscience* **23**, 9078–9088 (2003).
- 621 51. Yttri, E. A. & Dudman, J. T. A Proposed Circuit Computation in Basal Ganglia: History-Dependent Gain.  
622 *Movement Disorders* **33**, 704–716 (2018).
- 623 52. Fried, N. T., Chamessian, A., Zylka, M. J. & Abdus-Saboor, I. Improving pain assessment in mice and rats with  
624 advanced videography and computational approaches. *Pain* **161**, 1420–1424 (2020).
- 625 53. Datta, S. R., Anderson, D. J., Branson, K., Perona, P. & Leifer, A. Computational Neuroethology: A Call to Action  
626 (2019).
- 627 54. Yttri, E. A. & Dudman, J. T. Opponent and bidirectional control of movement velocity in the basal ganglia. *Nature*  
628 **533**, 402–6 (2016).
- 629 55. Graybiel, A. M. & Saka, E. A genetic basis for obsessive grooming. *Neuron* **33**, 1–2 (2002).
- 630 56. Berridge, K. C., Aldridge, J. W., Houchard, K. R. & Zhuang, X. Sequential super-stereotypy of an instinctive fixed  
631 action pattern in hyper-dopaminergic mutant mice: A model of obsessive compulsive disorder and Tourette's. *BMC*  
632 *Biology* **3** (2005).
- 633 57. Schweihoff, J. F. *et al.* DeepLabStream: Closing the loop using deep learning-based markerless, real-time posture  
634 detection. *bioRxiv* 2019.12.20.884478 (2019).
- 635 58. Yang, C. F. *et al.* Sexually dimorphic neurons in the ventromedial hypothalamus govern mating in both sexes and  
636 aggression in males. *Cell* **153**, 896–909 (2013).

- 637 59. van Unen, V. *et al.* Mass Cytometry of the Human Mucosal Immune System Identifies Tissue- and  
638 Disease-Associated Immune Subsets. *Immunity* **44**, 1227–1239 (2016).
- 639 60. Ali, M., Jones, M. W., Xie, X. & Williams, M. TimeCluster: dimension reduction applied to temporal data for  
640 visual analytics. *Visual Computer* **35**, 1013–1026 (2019).
- 641 61. Packer, J. S. *et al.* A lineage-resolved molecular atlas of C. Elegans embryogenesis at single-cell resolution. *Science*  
642 **365** (2019).
- 643 62. Stringer, C. *et al.* Spontaneous behaviors drive multidimensional, brainwide activity. *Science* **364** (2019).
